# Supplementary material for: A novel role of DNA polymerase λ in translesion synthesis in conjunction with DNA polymerase ζ
Source: Life Sci Alliance. 2021 Jan 29;4(4):e202000900. doi: 10.26508/lsa.202000900 (PMC7898466; doi:10.26508/lsa.202000900)
Supplement: Supplementary file 2 [file LSA-2020-00900_TableS2.xlsx]

## Sheet: Table S2
Table S2	Statistical analyses of TLS data in Table 2
Cells and DNA lesion	siRNA	Comparison of TLS data in siRNA of	Chi-square test	Fisher's exact test
XPV HFs	Rev3	Rev3 vs NC	* (p 0.025)	* (p 0.028)
	Rev7	Rev7 vs NC	* (p 0.026)	* (p 0.030)
cis-syn	Poll	Poll vs NC	* (p 0.043)	* (p 0.046)
TT dimer	Rev3 + Poll	Poll vs Rev3 + Poll	ns	ns
	Rev7 + Poll	Poll vs Rev7 + Poll	ns	ns
XPV HFs	Polθ	Polq vs NC	** (p 0.0078)	** (p 0.0097)
	Rev3	Rev3 vs NC	** (p 0.0019)	** (p 0.0020)
(6-4) TT PP	Poll	Poll vs NC	** (p 0.0022)	** (p 0.0022)
	Rev3 + Poll	Poll vs Rev3 + Poll	ns	ns
	Polq + Poll	Poll vs Polq + Poll	* (p 0.0407)	* (p 0.0483)
Poll-/- MEFs	Rev3	Rev3 vs NC	ns	ns
cis-syn TT dimer	Polη	Polh vs NC	*** (p 0.0004)	*** (p 0.0004)
Poll-/- MEFs	Rev3	Rev3 vs NC	ns	ns
(6-4) TT PP	Rev1	Rev1 vs NC	**** (p<0.0001)	**** (p<0.0001)
	Polθ	Polq vs NC	**** (p<0.0001)	**** (p<0.0001)
