# Supplementary material for: A novel role of DNA polymerase λ in translesion synthesis in conjunction with DNA polymerase ζ
Source: Life Sci Alliance. 2021 Jan 29;4(4):e202000900. doi: 10.26508/lsa.202000900 (PMC7898466; doi:10.26508/lsa.202000900)
Supplement: Supplementary file 3 [file LSA-2020-00900_TableS3.xlsx]

## Sheet: Table S3
Table S3	Statistical analyses of TLS data in Table 3 for Poll-/- MEFs expressing catalytically active (WT) Poll, catalytically inactive mutant Poll, or no Poll (control)
DNA lesion	Vector expressing	Comparison of TLS data in	Chi-square test	Fisher's exact test
cis-syn	WT Poll	WT Poll vs no Poll	ns	ns
TT dimer	mutant Poll	mutant Poll vs WT Poll	ns	ns
(6-4) TT	WT Poll	WT Poll vs no Poll	*** (p 0.0003)	*** (p 0.0003)
PP	mutant Poll	mutant Poll vs WT Poll	*** (p 0.0002)	*** (p 0.0002)
Tg	WT Poll	WT Poll vs no Poll	*** (p 0.0002)	*** (p 0.0002)
	mutant Poll	mutant Poll vs WT Poll	ns	ns
edA	WT Poll	WT Poll vs no Poll	** (p 0.0042)	** (p 0.0044)
	mutant Poll	mutant Poll vs WT Poll	ns	ns
